# Supplementary material for: Effects of different moisture contents on the structural and functional properties of cellulose with cell wall components in different citrus fibres
Source: Royal Society of Chemistry journal article supplement (doi:10.1039/d1fo02808a), 2022-01-01
Supplement: d1fo02808a1.pdf [file d1fo02808a1.pdf]

## Effects of different moisture content on structural and functional properties cellulose with cell wall components in different citrus fibres.

Kaja Kristensen<sup>1</sup>, George Warne<sup>1</sup>, Deepa Agarwal<sup>\*1,2</sup>, Tim J. Foster<sup>1</sup>

*1 Division of Food, Nutrition, and Dietetics, School of Biosciences, University of Nottingham, Sutton Bonington Campus, Loughborough, LE12 5RD, UK.*

*2 The New Zealand Institute of Plant and Food Research, Plant & Food Research Canterbury Agriculture & Science Centre, Gerald St, Lincoln 7608, New Zealand.*

*\*Corresponding author email: Deepa.Agarwal@plantandfood.co.nz*

### Supplementary Data:

#### Supplementary Figures:

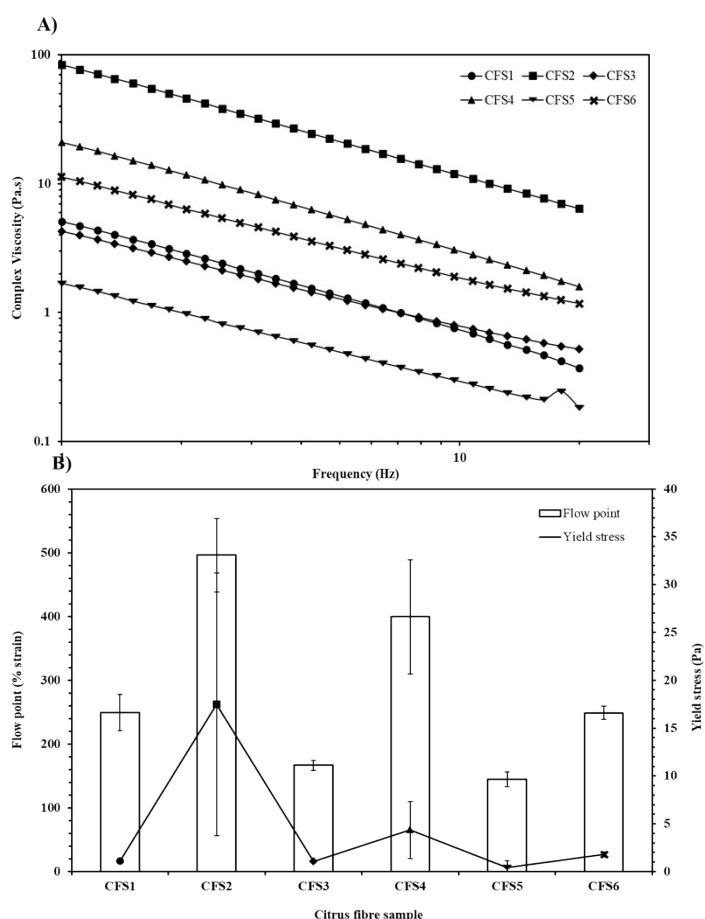

**Figure S1.** Rheological properties of 2% w/w aqueous citrus fibre suspensions (CFS1-CFS6), where A) is the complex viscosity measured as a function of frequency at 0.2% shear strain, B) is the flow point and yield stress values taken at 1 Hz constant frequency from the amplitude sweeps. All values were measured at  $20 \pm 1$  °C.

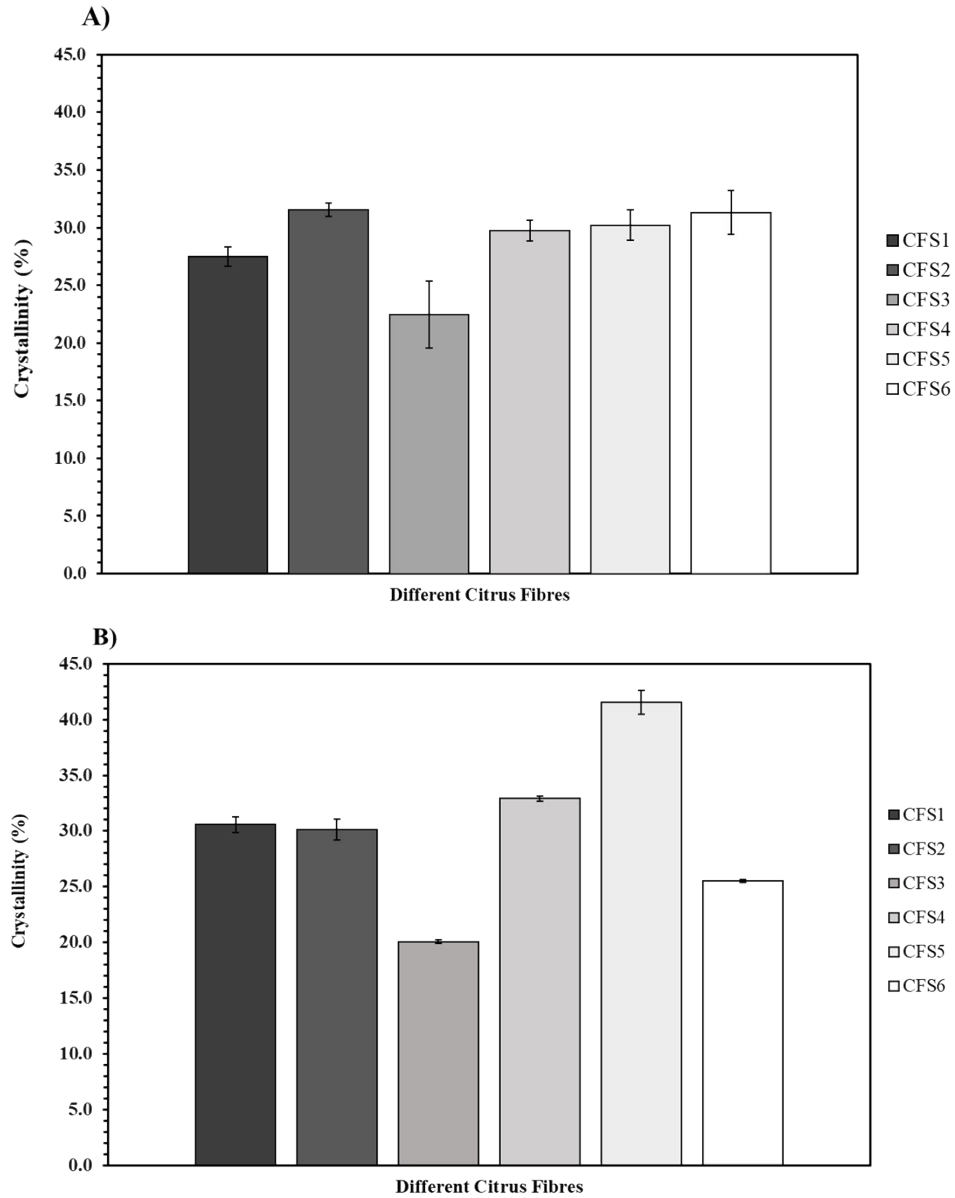

**Supplementary Figure S2.** Degree of crystallinity for the citrus fibre samples (CFS1-CFS6), where A) low moisture and B) medium moisture. The plots are illustrated as the average values of two replicates  $\pm$  standard deviations.

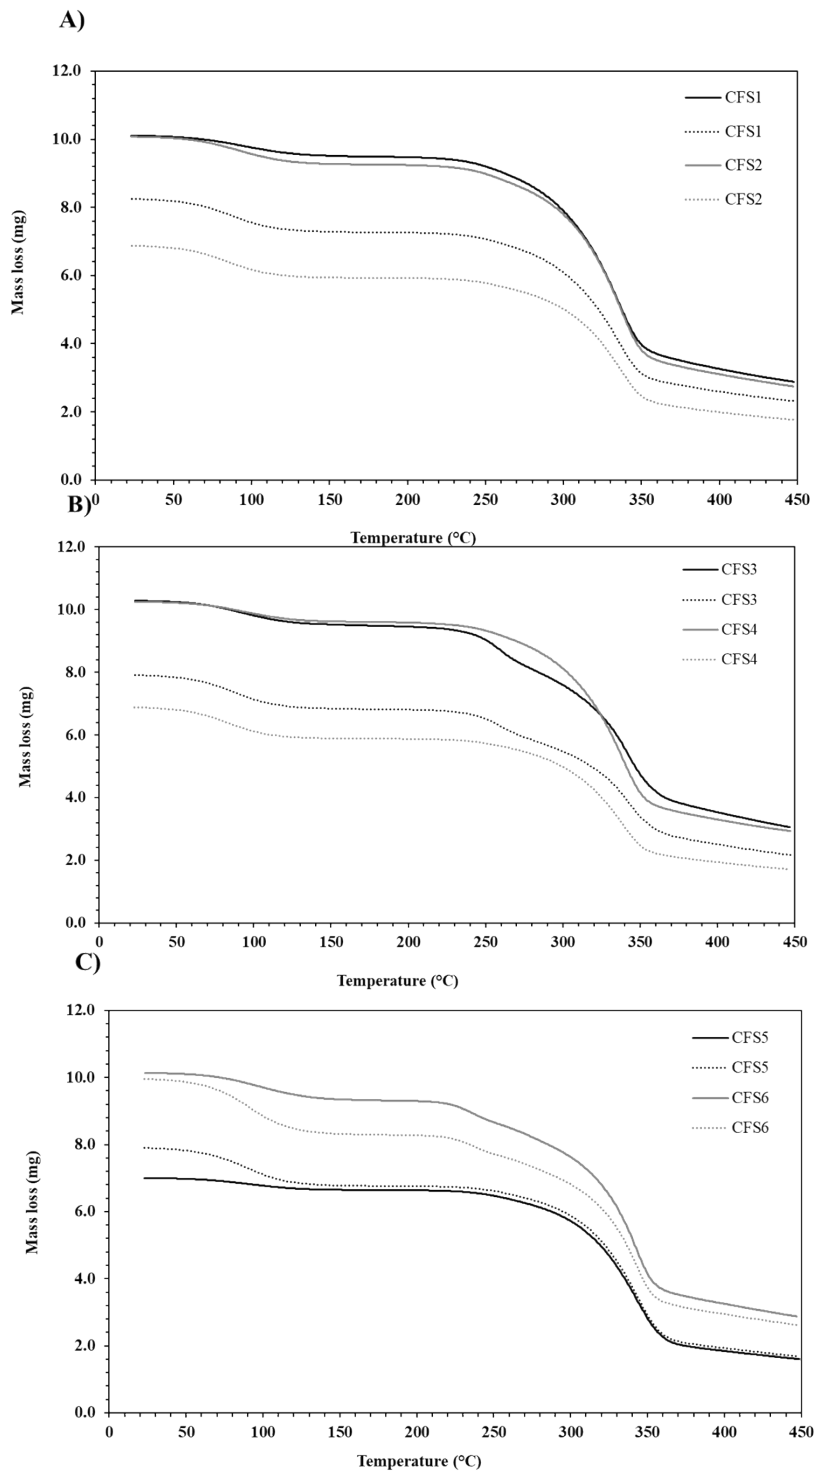

**Supplementary Figure S3.** Thermogravimetric curves of samples A) CFS1 & CFS2, B) CFS3 & CFS4, and C) CFS5 & CFS6, where solid lines represent samples with low moisture (5-7% w/w), and dashed lines represent samples with medium moisture (14-17% w/w).

Supplementary Tables:

**Table S1.** Absorbance band assignment according to Boeriu, Bravo, Gosselink, & van Dam (2004), Carrillo, Colom, Suñol, & Saurina (2004), Célino, Gonçalves, Jacquemin, & Fréor (2014), Olsson & Salmén (2004), and Poletto, Júnior, & Zattera (2014).

| Wave number (cm <sup>-1</sup> ) | Assignment                                          | Component                     |
|---------------------------------|-----------------------------------------------------|-------------------------------|
| 3600-3300                       | -OH stretching                                      | Carbohydrate, lignin          |
| 2900-2855, 1360-1310            | -CH, -CH <sub>2</sub> , -CH <sub>3</sub> stretching | Carbohydrate, lignin          |
| 1730                            | C=O stretching                                      | Pectin, hemicellulose         |
| 1620                            | C=O, C=C, -OH stretching                            | Carbohydrate, lignin          |
| 1600, 1500, 1260                | Aromatic ring vibration                             | Lignin                        |
| 1415                            | -CH, COO <sup>-</sup> vibration                     | Carbohydrate, lignin          |
| 1230                            | C=C, C=O, C-O vibration                             | Lignin, pectin, hemicellulose |
| 1150-1020                       | R-O-R, C-O stretching                               | Carbohydrate, lignin          |
| 890                             | β-links                                             | Cellulose                     |

**Table S2.** Peak areas at 1595, 1509, 1275, and 1220 cm<sup>-1</sup> for the citrus fibre samples (CFS1-CFS6) in low moisture (LM) and medium moisture (MM) systems. Data are presented as the mean value of five replicates ± standard deviations.

|                     | Peak area at<br>1595 cm <sup>-1</sup> | Peak area at 1509<br>cm <sup>-1</sup> | Peak area at 1275<br>cm <sup>-1</sup> | Peak area at<br>1220 cm <sup>-1</sup> |
|---------------------|---------------------------------------|---------------------------------------|---------------------------------------|---------------------------------------|
| Lignin <sup>1</sup> | 2.61±0.49                             | 1.94±0.45                             | 2.15±0.57                             | 2.83±0.68                             |
| CFS1LM              | 0.91±0.23                             | 0.53±0.19                             | 1.26±0.36                             | 0.81±0.29                             |
| CFS1MM              | 1.64±0.20                             | 0.80±0.13                             | 1.32±0.26                             | 0.66±0.21                             |
| CFS2LM              | 0.72±0.13                             | 0.25±0.09                             | 0.86±0.18                             | 0.43±0.16                             |
| CFS2MM              | 1.27±0.54                             | 0.45±0.26                             | 0.84±0.511                            | 0.29±0.23                             |
| CFS3LM              | 0.82±0.35                             | 0.37±0.27                             | 0.95±0.53                             | 0.77±0.50                             |

|        |           |           |           |           |
|--------|-----------|-----------|-----------|-----------|
| CFS3MM | 1.88±0.29 | 0.99±0.17 | 2.01±0.39 | 1.61±0.37 |
| CFS4LM | 0.57±0.15 | 0.27±0.12 | 0.82±0.23 | 0.43±0.19 |
| CFS4MM | 1.20±0.28 | 0.40±0.21 | 0.88±0.35 | 0.29±0.25 |
| CFS5LM | 0.42±0.10 | 0.08±0.06 | 0.77±0.17 | 0.35±0.13 |
| CFS5MM | 1.30±0.19 | 0.33±0.11 | 1.33±0.24 | 0.49±0.18 |
| CFS6LM | 0.67±0.24 | 0.28±0.17 | 0.71±0.32 | 0.59±0.30 |
| CFS6MM | 2.19±0.16 | 0.48±0.12 | 1.38±0.19 | 0.80±0.17 |

<sup>1</sup> Lignin was obtained from Sigma-Aldrich (Gillingham, UK).

Quantification of the peak areas at 1595 (1610-1579), 1509 (1524-1495), 1275 (1290-1260), and 1220 (1234-1206)  $\text{cm}^{-1}$  was adapted from Huang et al. (2012) (Table S2). Peak areas were baseline corrected using asymmetric least squares regression in OriginPro 9.8.0.200 (OriginLab Corporation, USA). The following parameters were used: Asymmetric factor (0.0001), Threshold (0.005), Smoothing factor (6.5), and Number of iterations (10). Peak areas were identified through OriginPro at these specified wavelengths with  $\pm 15 \text{ cm}^{-1}$ .

**Table S3.** Loadings of infrared vibration data on PC-1 and PC-2.

|      | Positive loadings            | Negative loadings            |
|------|------------------------------|------------------------------|
| PC-1 | 2880, 2855, 1450, 1269, 1088 | 3626, 3453, 3262, 3082, 1651 |
| PC-2 | 3697, 3120, 1724, 1450, 907  | 3406, 2829, 1179             |

**Table S4.** Derivative thermogravimetric peak temperatures and mass loss rates for the citrus fibre samples (CFS1-CFS6) in low moisture (LM) and medium moisture (MM) systems.

|  | Starting point |                                                        | Moisture peak |                                                        | Pectin peak <sup>1</sup> |                                                        | Cellulose peak <sup>2</sup> |                                                        |
|--|----------------|--------------------------------------------------------|---------------|--------------------------------------------------------|--------------------------|--------------------------------------------------------|-----------------------------|--------------------------------------------------------|
|  | Temp.<br>(°C)  | Mass<br>loss rate<br>( $\text{mg}\cdot\text{s}^{-1}$ ) | Temp.<br>(°C) | Mass<br>loss rate<br>( $\text{mg}\cdot\text{s}^{-1}$ ) | Temp.<br>(°C)            | Mass<br>loss rate<br>( $\text{mg}\cdot\text{s}^{-1}$ ) | Temp.<br>(°C)               | Mass<br>loss rate<br>( $\text{mg}\cdot\text{s}^{-1}$ ) |
|  |                |                                                        |               |                                                        |                          |                                                        |                             |                                                        |

|        |      |                      |      |                      |     |                      |     |                      |
|--------|------|----------------------|------|----------------------|-----|----------------------|-----|----------------------|
| CFS1LM | 23.0 | $9.73 \cdot 10^{-5}$ | 93.4 | $1.45 \cdot 10^{-3}$ | -   | -                    | 336 | $1.75 \cdot 10^{-2}$ |
| CFS1MM | 23.1 | $1.84 \cdot 10^{-4}$ | 86.8 | $2.87 \cdot 10^{-3}$ | -   | -                    | 336 | $1.32 \cdot 10^{-2}$ |
| CFS2LM | 23.0 | $1.15 \cdot 10^{-4}$ | 92.3 | $2.14 \cdot 10^{-3}$ | -   | -                    | 337 | $1.83 \cdot 10^{-2}$ |
| CFS2MM | 23.1 | $2.16 \cdot 10^{-4}$ | 84.3 | $2.83 \cdot 10^{-3}$ | -   | -                    | 338 | $1.17 \cdot 10^{-2}$ |
| CFS3LM | 23.4 | $1.10 \cdot 10^{-4}$ | 92.1 | $2.04 \cdot 10^{-3}$ | 259 | $6.48 \cdot 10^{-3}$ | 342 | $1.47 \cdot 10^{-2}$ |
| CFS3MM | 23.1 | $2.04 \cdot 10^{-4}$ | 87.2 | $3.17 \cdot 10^{-3}$ | 259 | $2.87 \cdot 10^{-3}$ | 342 | $1.08 \cdot 10^{-2}$ |
| CFS4LM | 23.2 | $7.53 \cdot 10^{-5}$ | 93.2 | $1.65 \cdot 10^{-3}$ | -   | -                    | 339 | $1.82 \cdot 10^{-2}$ |
| CFS4MM | 23.0 | $2.66 \cdot 10^{-4}$ | 84.0 | $3.03 \cdot 10^{-3}$ | -   | -                    | 339 | $1.14 \cdot 10^{-2}$ |
| CFS5LM | 23.1 | $5.54 \cdot 10^{-5}$ | 92.1 | $9.09 \cdot 10^{-4}$ | -   | -                    | 343 | $1.38 \cdot 10^{-2}$ |
| CFS5MM | 23.1 | $2.05 \cdot 10^{-4}$ | 91.2 | $3.43 \cdot 10^{-3}$ | -   | -                    | 344 | $1.44 \cdot 10^{-2}$ |
| CFS6LM | 23.2 | $8.34 \cdot 10^{-5}$ | 96.9 | $2.03 \cdot 10^{-3}$ | 236 | $3.82 \cdot 10^{-3}$ | 343 | $1.88 \cdot 10^{-2}$ |
| CFS6MM | 22.7 | $2.40 \cdot 10^{-4}$ | 90.8 | $4.98 \cdot 10^{-3}$ | 236 | $3.36 \cdot 10^{-3}$ | 343 | $1.70 \cdot 10^{-2}$ |

<sup>1</sup> The pectin peak was identified as the local peak maximum between 200 °C and 286 °C for the CFS3 samples or between 200 °C and 256 °C for the CFS6 samples.

<sup>2</sup> The cellulose peak was identified as the local peak maximum between 300-450 °C.

**Table S5.** GAB model parameters for the citrus fibre samples (CFS1-CFS6) at room temperature.

|      | $M_0$ (g/100 g) <sup>1</sup> | $C^2$ | $K^2$ | $R^2$  |
|------|------------------------------|-------|-------|--------|
| CFS1 | 6.14                         | 10.9  | 0.79  | 0.9994 |
| CFS2 | 5.10                         | 23.3  | 0.83  | 0.9970 |
| CFS3 | 5.84                         | 13.6  | 0.79  | 0.9997 |
| CFS4 | 5.07                         | 22.5  | 0.83  | 0.9982 |
| CFS5 | 4.89                         | 19.8  | 0.81  | 0.9981 |
| CFS6 | 5.88                         | 22.2  | 0.80  | 0.9962 |

<sup>1</sup>  $M_0$  is the moisture content in the monolayer (g water/100 g dry solids).

<sup>2</sup>  $C$  and  $K$  are temperature-dependent constants.
